# Supplementary material
Source: PubMed Central journal article supplement (PMC7685565)
Supplement: NIHMS1643235-supplement-Supplement_4.pdf [file NIHMS1643235-supplement-Supplement_4.pdf]

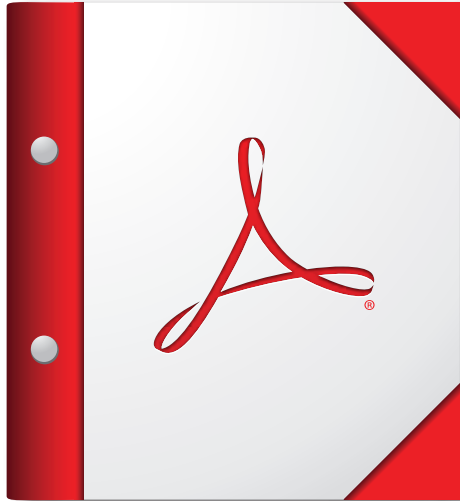

**For the best experience, open this PDF portfolio in  
Acrobat X or Adobe Reader X, or later.**

[Get Adobe Reader Now!](#)
